# Supplementary material
Source: publisher figshare collection journal article supplement (https://springernature.figshare.com/ndownloader/files/15323873)
Supplement: Supplementary file 1 [file 15323873]

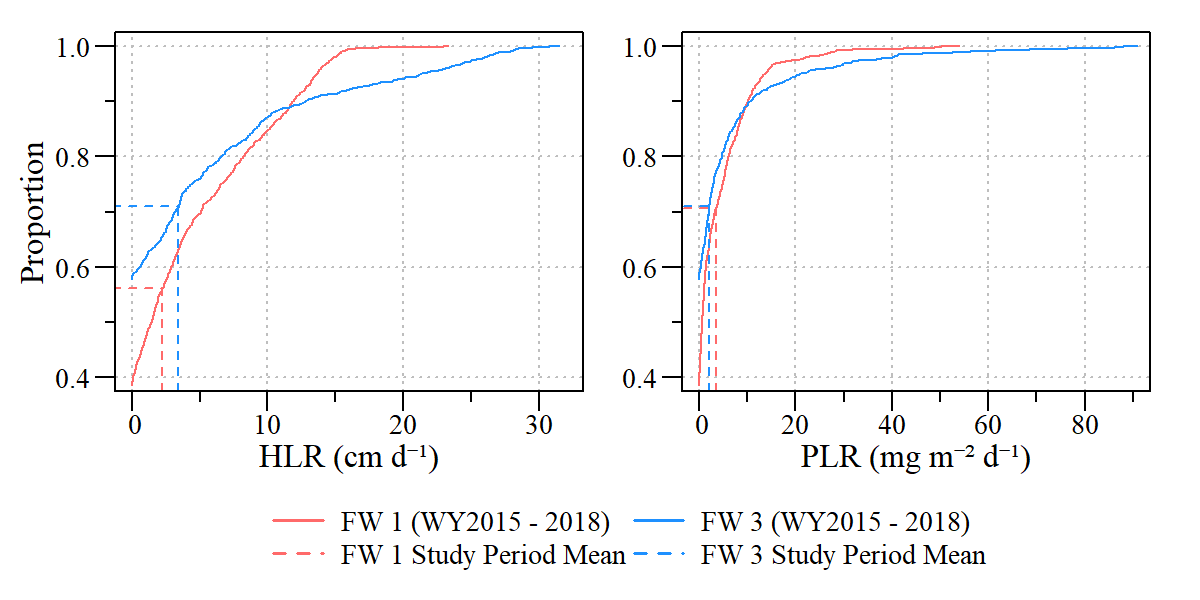


Figure S3. Cumulative distribution plots of hydraulic (left) and phosphorus (right) loading rates for flow-ways 1 and 2 (FW1 and FW2, respectively) for data collected between May 1st 2014 and April 30th 2018 (solid lines) relative to experiment flow period mean values (dashed values) for each flow-way.
